# Supplementary material for: Akkermansia muciniphila Promotes Bone Development and Improves Eggshell Quality during the Sexual Maturity Period of Laying Hens by Increasing Osteogenesis
Source: MDPI journal article supplement (doi:10.3390/agriculture14040598), 2024-04-10
Supplement: s1 [file s1]

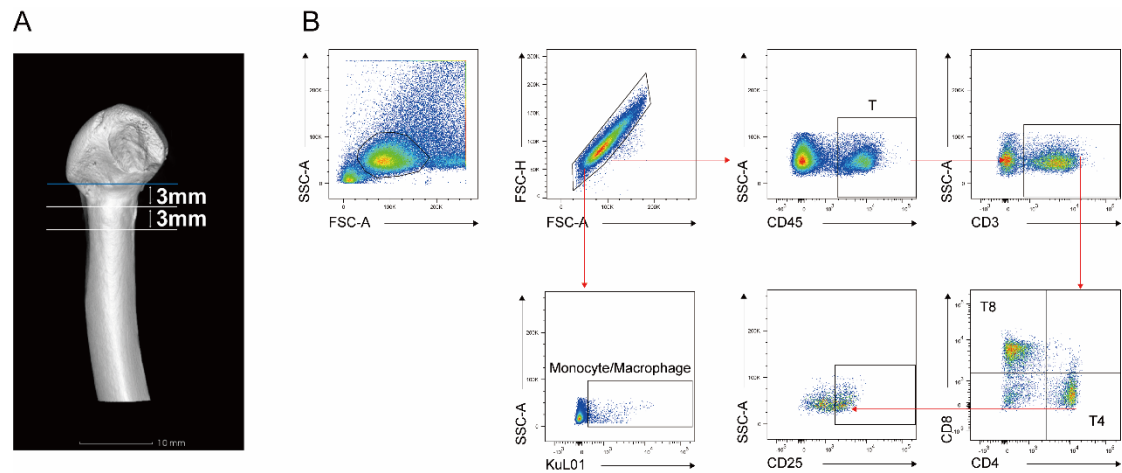

**Figure S1.** (A) The determination of femoral volume of interest in micro-CT analysis. (B) Gating strategy of flow cytometry.

Table S1. Key antibody table

| Antibody                                               | Source                   |
|--------------------------------------------------------|--------------------------|
| Mouse Anti-Chicken CD45-PE                             | Southernbiotech, 8270-02 |
| Mouse Anti-Chicken CD3-APC                             | Southernbiotech, 8200-11 |
| Mouse Anti-Chicken CD4-PE/CY7                          | Southernbiotech, 8210-17 |
| Mouse Anti-Chicken CD8 $\alpha$ -Pacific Blue™         | Southernbiotech, 8395-26 |
| Human Anti-Chicken CD25-FITC                           | BIO-RAD, AbD13504        |
| Mouse Anti-Chicken Monocyte/Macrophage-Alexa Fluor-647 | Southernbiotech, 8420-31 |
